# Supplementary material for: Quinoa is more effective than other whole grains in the management of impaired glucose tolerance: a randomized controlled trial
Source: Royal Society of Chemistry journal article supplement (doi:10.1039/d4fo04557b), 2024-12-20
Supplement: d4fo04557b2.pdf [file d4fo04557b2.pdf]

Supplement Table 2:

| Mean daily intake of nutrients before and at the end of treatment (mean ± SD) |                         |                         |                       |                  |                         |                         |                       |                  |  |
|-------------------------------------------------------------------------------|-------------------------|-------------------------|-----------------------|------------------|-------------------------|-------------------------|-----------------------|------------------|--|
| Baseline                                                                      |                         |                         |                       |                  | Month 12                |                         |                       |                  |  |
|                                                                               | QG                      | WGG                     | CG                    | <i>P</i> -value* | QG                      | WGG                     | CG                    | <i>P</i> -value* |  |
| Dietary Energy intake (kcal per day)                                          | 1822±382                | 1739±692                | 1846±398              | 0.441            | 1786±348                | 1809±429                | 1805±378              | 0.526            |  |
| Dietary Nutrient Intake                                                       |                         |                         |                       |                  |                         |                         |                       |                  |  |
| Protein (g per day)                                                           | 105.6±23.4              | 94.9±49.0               | 101.8±23.8            | 0.194            | 112.3±25.2              | 102.4±37.8              | 99.8±24.7             | 0.183            |  |
| Fat (g per day)                                                               | 67.2±15.2               | 61.3±33.6               | 70.3±21.9             | 0.105            | 65.7±18.9               | 63.8±33.6               | 67.3±20.8             | 0.233            |  |
| Carbohydrate (g per day)                                                      | 206.0±53.0              | 209.8±67.0              | 206.0±48.1            | 0.903            | 206.0±53.0              | 200.6±63.3              | 208.4±52.3            | 0.895            |  |
| Dietary Fiber (g per day)                                                     | 16.6±6.0 <sup>a</sup> ※ | 10.3±6.2 <sup>b</sup> ※ | 12.1±6.2 <sup>b</sup> | <0.001           | 22.4±7.2 <sup>a</sup> ※ | 17.3±6.7 <sup>b</sup> ※ | 13.2±6.6 <sup>b</sup> | <0.001           |  |

QG: Quinoa Group, WGG: Multi Whole Grain Group, CG: Control Group. Values are presented as mean ± SD;

\* Values were derived from ANOVA. Values in a row with different superscript letters are significantly different, *P* < 0.05 (Bonferroni post hoc test for pairwise comparisons).

※ Differ from Baseline, *P* < 0.05.
